# Supplementary material for: Cucurbituril-protected dual-readout gold nanoclusters for sensitive fentanyl detection
Source: Royal Society of Chemistry journal article supplement (doi:10.1039/d2an01748b), 2023-01-01
Supplement: d2an01748b1.pdf [file d2an01748b1.pdf]

## Supporting Information

### Cucurbituril-protected dual-readout gold nanoclusters for sensitive fentanyl detection in sewage

Kun Yan,<sup>a</sup> Lancheng Wang,<sup>a</sup> Zhihang Zhu,<sup>a</sup> Shiqi Duan,<sup>a</sup> Zhendong Hua,<sup>b</sup> Peng Xu,<sup>b</sup> Hui Xu,<sup>a</sup> Chi Hu,<sup>\*a</sup> Youmei Wang,<sup>\*b</sup> and Bin Di<sup>\*a</sup>

<sup>a</sup> China National Narcotics Control Commission - China Pharmaceutical University

Joint Laboratory on Key Technologies of Narcotics Control, No. 24 Tongjiaxiang  
Road, Nanjing 210009, China.

<sup>b</sup> Key Laboratory of Drug Monitoring and Control, Drug Intelligence and Forensic  
Center, Ministry of Public Security, Beijing, China.

#### Corresponding Author:

Chi Hu, E-mail: [chihu@cpu.edu.cn](mailto:chihu@cpu.edu.cn);

Youmei Wang, E-mail: youmei\_626@163.com;

Bin Di, E-mail: [dibin@cpu.edu.cn](mailto:dibin@cpu.edu.cn)

## Contents

|                                                       |            |
|-------------------------------------------------------|------------|
| <b>Optimization of macrocyclic host.....</b>          | <b>S3</b>  |
| <b>Optimization of Q7 concentration.....</b>          | <b>S4</b>  |
| <b>DLS.....</b>                                       | <b>S5</b>  |
| <b>HR-TEM images.....</b>                             | <b>S6</b>  |
| <b><sup>1</sup>H NMR spectroscopic titration.....</b> | <b>S6</b>  |
| <b>Stoichiometric evaluation.....</b>                 | <b>S7</b>  |
| <b>Calculation of binding constants <i>K</i>.....</b> | <b>S8</b>  |
| <b>Emission and UV-vis titrations.....</b>            | <b>S9</b>  |
| <b>Method comparison.....</b>                         | <b>S10</b> |
| <b>References.....</b>                                | <b>S11</b> |

### Optimization of macrocyclic host

In order to obtain more excellent sensor for FEN detection, the relative values of fluorescence quantum yield for free FGGC-AuNCs and FGGC-AuNCs assembled with Q<sub>n</sub> (n=5-8) were measured according to literature method using rhodamine B as fluorescence standard (quantum yield 0.31, in water).<sup>1</sup> The results were shown in table S1. Obviously, Q7 displayed the optimal ability to brighten FGGC-AuNCs, which was finally used for further assay of FEN.

Table S1 Quantum yield of FGGC-AuNCs with and without added Q<sub>n</sub> in aqueous solution

| Added Q <sub>n</sub> | Yield          |
|----------------------|----------------|
| -                    | 0.0616 ± 0.003 |
| Q5                   | 0.0613 ± 0.001 |
| Q6                   | 0.0617 ± 0.003 |
| Q7                   | 0.5616 ± 0.023 |
| Q8                   | 0.3965 ± 0.018 |

### Optimization of Q7 concentration

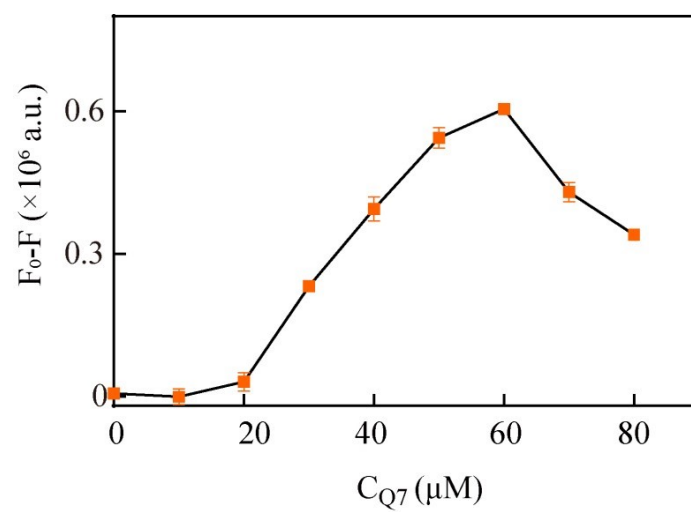

Fig. S1 The effect of FEN ( $5 \mu\text{g mL}^{-1}$ ) on emission spectra of FGGC-AuNCs self-assembled with different concentrations of Q7.

## DLS

DLS was used to investigate the hydrodynamic diameter of FGGC-AuNCs, FGGC-AuNCs@Q7 and FGGC-AuNCs@Q7 added with FEN. As shown in Fig. S2, the results of DLS showed the size of  $1.8 \pm 0.3$  nm for FGGC-AuNCs,  $1057.2 \pm 178.8$  nm for FGGC-AuNCs@Q7 and  $30.7 \pm 3.0$  nm for FGGC-AuNCs@Q7 added with FEN. Q7 caused obvious self-assembled aggregation for FGGC-AuNCs. However, the hydrodynamic diameter of FGGC-AuNCs@Q7 was far larger than that measured by HR-TEM, which might be attributed to the nanoscale polymer network under the surface-assembly of Q7 or the dehydration of samples during the TEM preparation. After addition of FEN, the hydrodynamic diameter was reduced and a weak peak for free FGGC-AuNCs was observed, which was also appeared in TEM images (Fig. S3B). These evidences further strengthened that Q7 could cause the aggregation of FGGC-AuNCs and FEN could result in depolymerization of FGGC-AuNCs@Q7 by competitive binding with Q7.

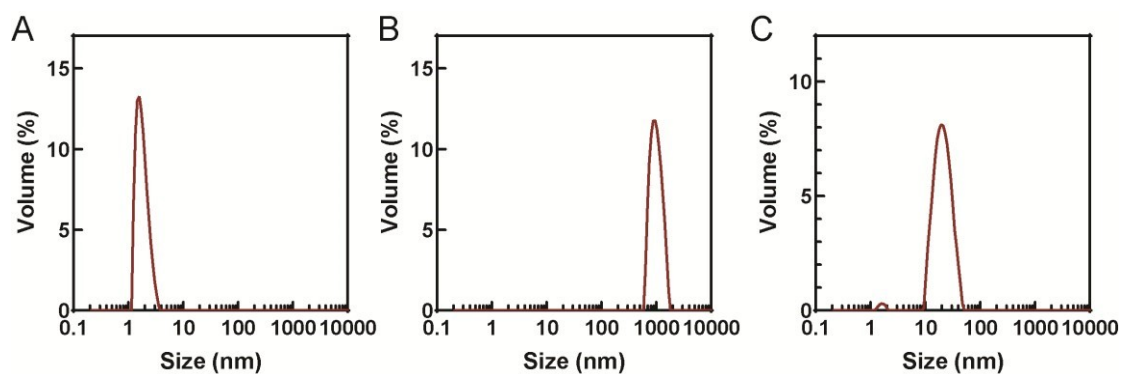

Fig. S2 Hydrodynamic diameter of (A) synthesized FGGC-AuNCs, (B) self-assembled FGGC-AuNCs@Q7 and (C) FGGC-AuNCs@Q7 added with FEN determined by DLS.

## HR-TEM images

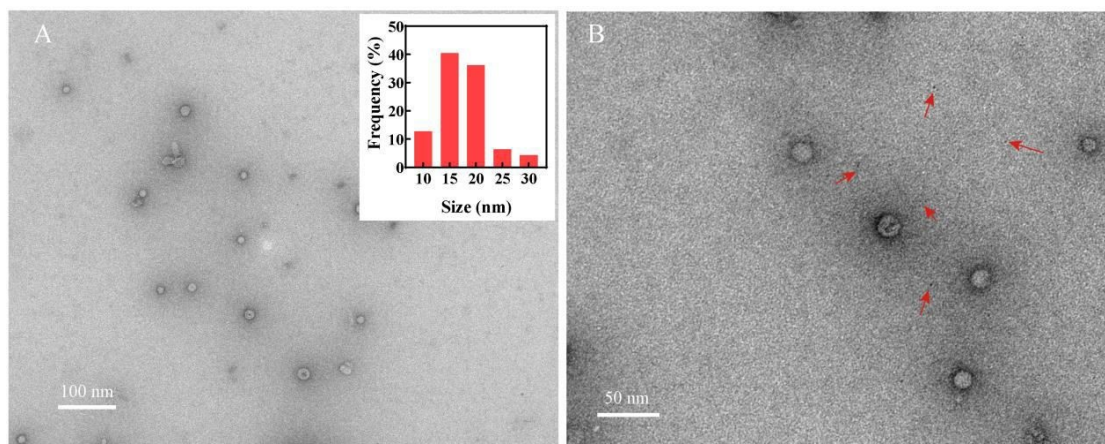

Fig. S3 HR-TEM images of self-assembled FGGC-AuNCs@Q7 added with FEN. Inset: size distribution histograms calculated from images. Free FGGC-AuNCs were marked by red arrows.

## $^1\text{H}$ NMR spectroscopic titration

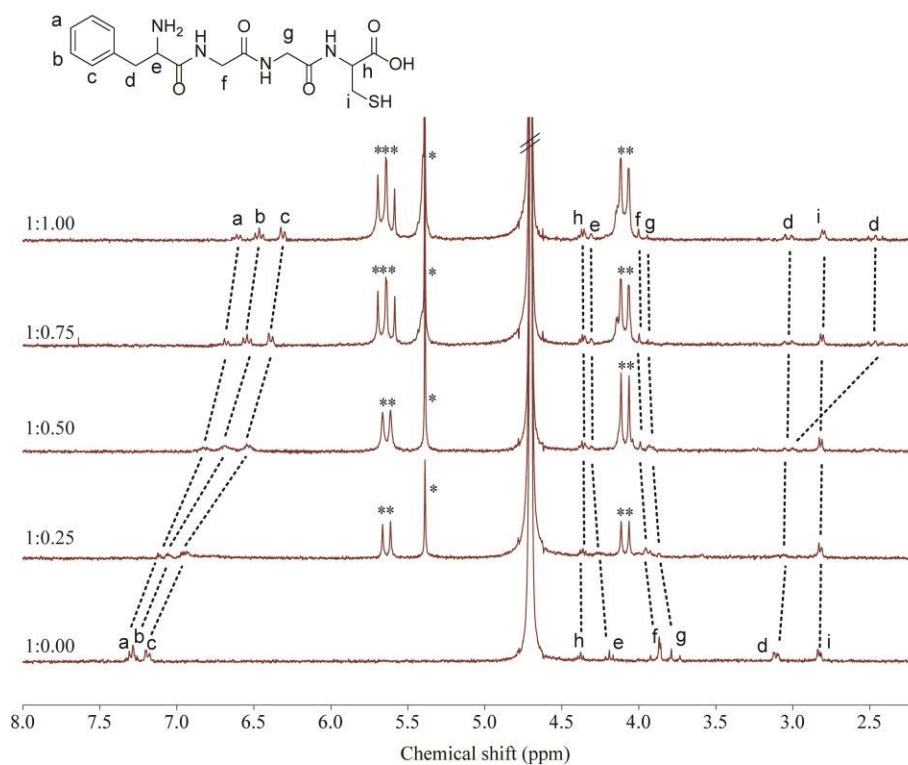

Fig. S4  $^1\text{H}$  NMR titration of Q7 into FGGC (1 mM) in  $\text{D}_2\text{O}$ . Molar ratio of FGGC to

Q7 increases from 1:0.00 to 1:1.00 from bottom to top. Asterisk indicates assignment of Q7 protons.

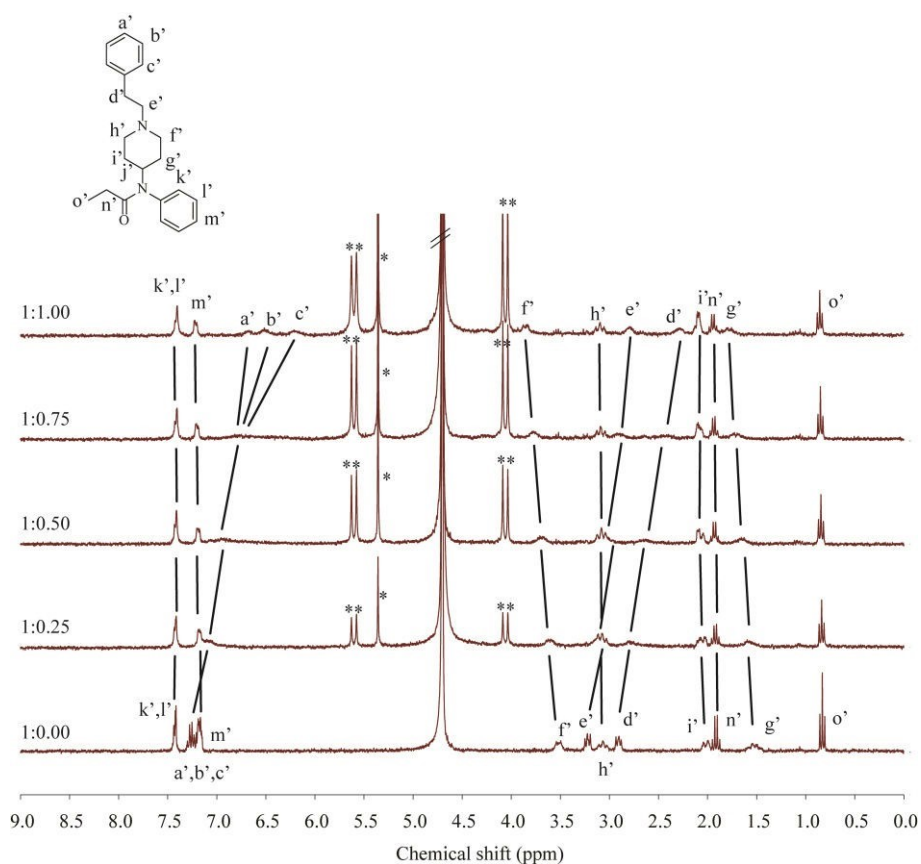

Fig. S5  $^1\text{H}$  NMR titration of Q7 into FEN (1 mM) in  $\text{D}_2\text{O}$ . Molar ratio of FEN to Q7 increases from 1:0.00 to 1:1.00 from bottom to top. Asterisk indicates assignment of Q7 protons.

### Stoichiometric evaluation

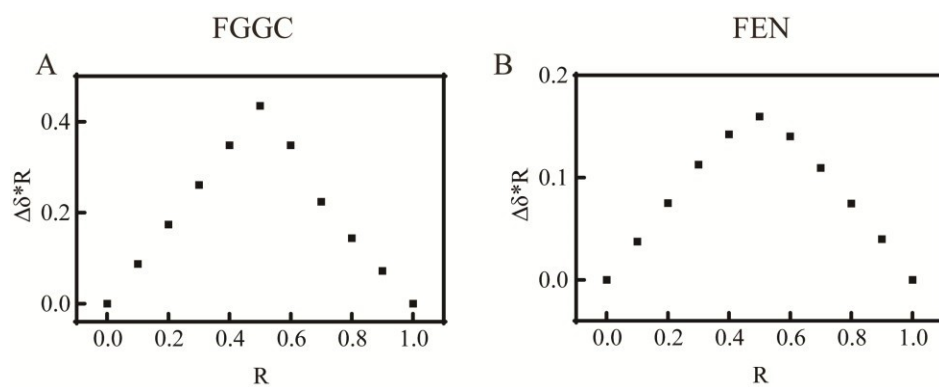

Fig. S6 Job's plots calculated by chemical shifts. R indicates the mole fractions of

guests. A: chemical shifts of proton c of FGGC were monitored; B: chemical shifts of proton f' of FEN were monitored.

### Calculation of binding constants $K$

The values of  $K$  were calculated by the Benesi-Hildebrand method.<sup>2,3</sup> The following equation Eq. 1 was used for the binding stoichiometry of 1:1.

$$\frac{1}{\delta - \delta_0} = \frac{1}{\delta' - \delta_0} + \frac{1}{(\delta' - \delta_0)[Q7]} \quad \text{Eq. 1}$$

where  $\delta$  is the chemical shift of guest under different concentration of Q7, and  $\delta_0$  is the chemical shift of guest in the absence of Q7.  $K$  is the binding constant of the complex, which was calculated from the ratio of intercept to the slope. The linear relationship between  $1/(\delta - \delta_0)$  and  $1/[Q7]$  was shown in Fig. S7.

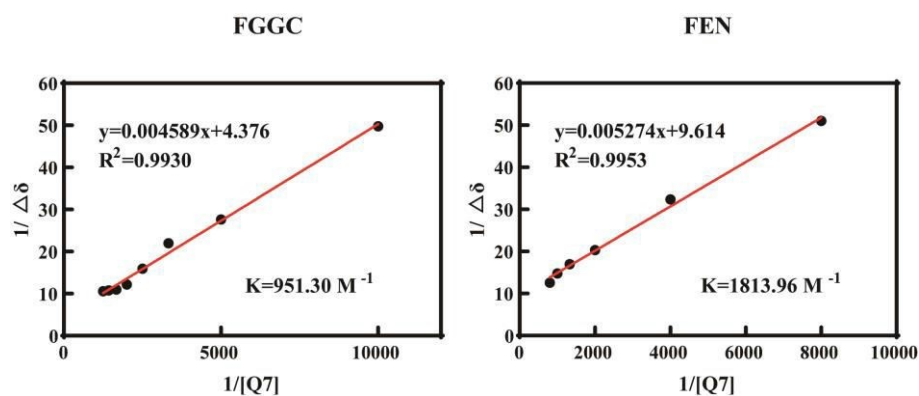

Fig. S7 Benesi-Hildebrand plots of  $1/(\delta - \delta_0)$  versus  $1/[Q7]$  based on  $^1\text{H}$  NMR signal changes.



## Emission and UV-vis titrations

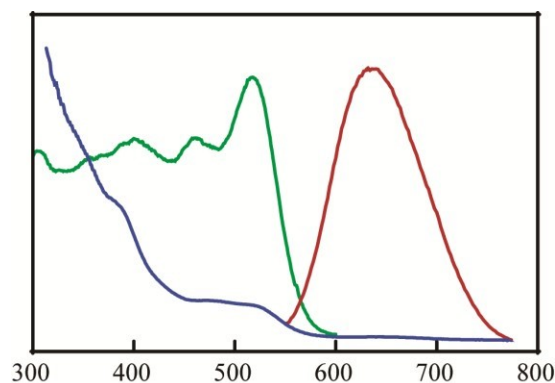

Fig. S8 The absorption spectrum (blue), excitation spectrum (green), and emission spectrum (red) of FGGC@AuNCs in aqueous solutions.

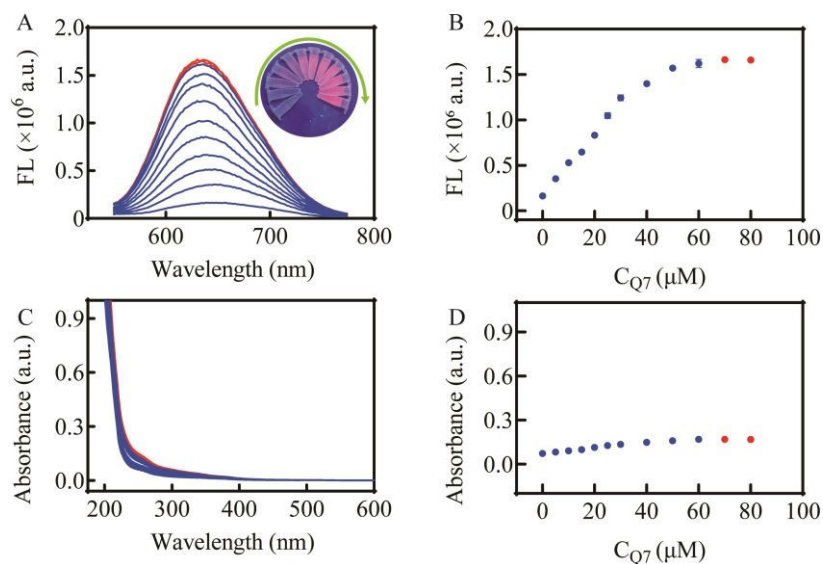

Fig. S9 Emission spectra (A) and normalized fluorescence at 640 nm (B) of FGGC-AuNCs with the increasing concentration of Q7 in aqueous solutions at the excitation wavelength of 515 nm. Inset: eppendorf tubes containing the corresponding solutions under 365 nm light. UV-vis spectra (C) and normalized absorbance at 275 nm (D) of FGGC-AuNCs with the increasing concentration of Q7 in aqueous solutions.

## Method comparison

Table S2 Comparison of the present method with previous methods for fentanyl detection

| Detection method | Description                    | Application                        | Linear range<br>(ng mL <sup>-1</sup> ) | LOD<br>(ng mL <sup>-1</sup> ) | Ref.      |
|------------------|--------------------------------|------------------------------------|----------------------------------------|-------------------------------|-----------|
| Electrochemical  | Single-walled carbon nanotubes | -                                  | -                                      | 3696                          | 4         |
| Immunoassay      | Test strips                    | Urine                              |                                        | 100                           | 5         |
| SERS             | AgNPs and microfluidic device  | Forensic analysis and quantitation |                                        | 100                           | 6         |
| Colorimetry      | SDS/Rose Bengal                | Diluted urine and domestic sewage  | 4020-29915                             | 700                           | 7         |
| Colorimetry      | Rose Bengal                    | Soft beverages                     | 201-20100                              | 100                           | 8         |
| Fluorescence     | FGGC-AuCNs@Q7                  | Diluted urine                      | 9-148000                               | 1                             | This work |

SDS: Sodium dodecyl sulfate

## References

1. X. Lv, C. Gao, T. Han, H. Shi and W. Guo, *Chemical Communications*, 2020, **56**, 715-718.
2. X. Cai, R. Kataria and B. C. Gibb, *J. Am. Chem. Soc.*, 2020, **142**, 8291-8298.
3. Y. Jin, W. Sun, H. Lv and S. Tong, *Chirality*, 2020, **32**, 1257-1263.
4. N. Wester, E. Mynttinen, J. Etula, T. Lilius, E. Kalso, B. F. Mikladal, Q. Zhang, H. Jiang, S. Sainio, D. Nordlund, E. I. Kauppinen, T. Laurila and J. Koskinen, *ACS Appl. Nano Mater.*, 2020, **3**, 1203-1212.
5. T. C. Green, J. N. Park, M. Gilbert, M. McKenzie, E. Struth, R. Lucas, W. Clarke and S. G. Sherman, *Int. J. Drug Policy*, 2020, **77**, 102661.
6. A. Haddad, M. A. Comanescu, O. Green, T. A. Kubic and J. R. Lombardi, *Anal. Chem.*, 2018, **90**, 12678-12685.
7. Y. Lin, J. Sun, M. Tang, G. Zhang, L. Yu, X. Zhao, R. Ai, H. Yu, B. Shao and Y. He, *Anal. Chem.*, 2021, **93**, 6544-6550.
8. Y. Lin, J. Sun, X. Xiang, H. Yu, B. Shao and Y. He, *Sens. Actuators B Chem.*, 2022, **354**, 131215.
